# Supplementary material
Source: ML conference proceedings conference paper supplement (https://openaccess.thecvf.com/content/ICCV2023/html/Yang_StyleGANEX_StyleGAN-Based_Manipulation_ICCV_2023_paper.html)
Supplement: Supplementary file 1 [file Yang_StyleGANEX_StyleGAN-Based_Manipulation_ICCV_2023_supplemental.zip]

Archive with 3 entries (3 files):
- ICCV_01595_supp.pdf
- ICCV_01595_video.mp4
- ReadMe.txt
