# Supplementary material
Source: ML conference proceedings conference paper supplement (https://openaccess.thecvf.com/content/ICCV2023/html/Yang_StyleGANEX_StyleGAN-Based_Manipulation_ICCV_2023_paper.html)
Supplement: Supplementary file 1 [file Yang_StyleGANEX_StyleGAN-Based_Manipulation_ICCV_2023_supplemental.zip › ReadMe.txt]

********************************************************************************************************************
********************************************************************************************************************

Supplementary material for "StyleGANEX: StyleGAN-Based Manipulation Beyond Cropped Aligned Faces" 

********************************************************************************************************************
********************************************************************************************************************

Contents:

1. ICCV_01595_video.mp4: a video to show the overall performence of our method.

2. ICCV_01595_supp.pdf: a pdf to present the following contents,

Implementation Details of StyleGANEX 
	Dataset and Model 
	Network Architecture 
	Running Time 

Supplementary Experimental Results of StyleGANEX 
	Qualitative Evaluation 
	Quantitative Evaluation 
	Supplementary Domain Transfer Results

Compatibility to StyleGAN 


* Video Background Music: https://www.bensound.com
